# Supplementary material for: Mesoscale DNA features impact APOBEC3A and APOBEC3B deaminase activity and shape tumor mutational landscapes
Source: PubMed Central journal article supplement (PMC10948877; doi:10.1038/s41467-024-45909-5), 2024-03-18
Supplement: 41467_2024_45909_MOESM3_ESM.pdf [file 41467_2024_45909_MOESM3_ESM.pdf]

## **Description of Additional Supplementary Files**

**File Name: Supplementary Data 1**

Number of mutations identified in mouse or human tumors caused by A3A or A3B in the indicated types of DNA structures.
